# Supplementary material
Source: PubMed Central journal article supplement (PMC5702665)
Supplement: 10.1074_M117.782300_jbc.M117.782300-1.pdf [file 10.1074_M117.782300_jbc.M117.782300-1.pdf]

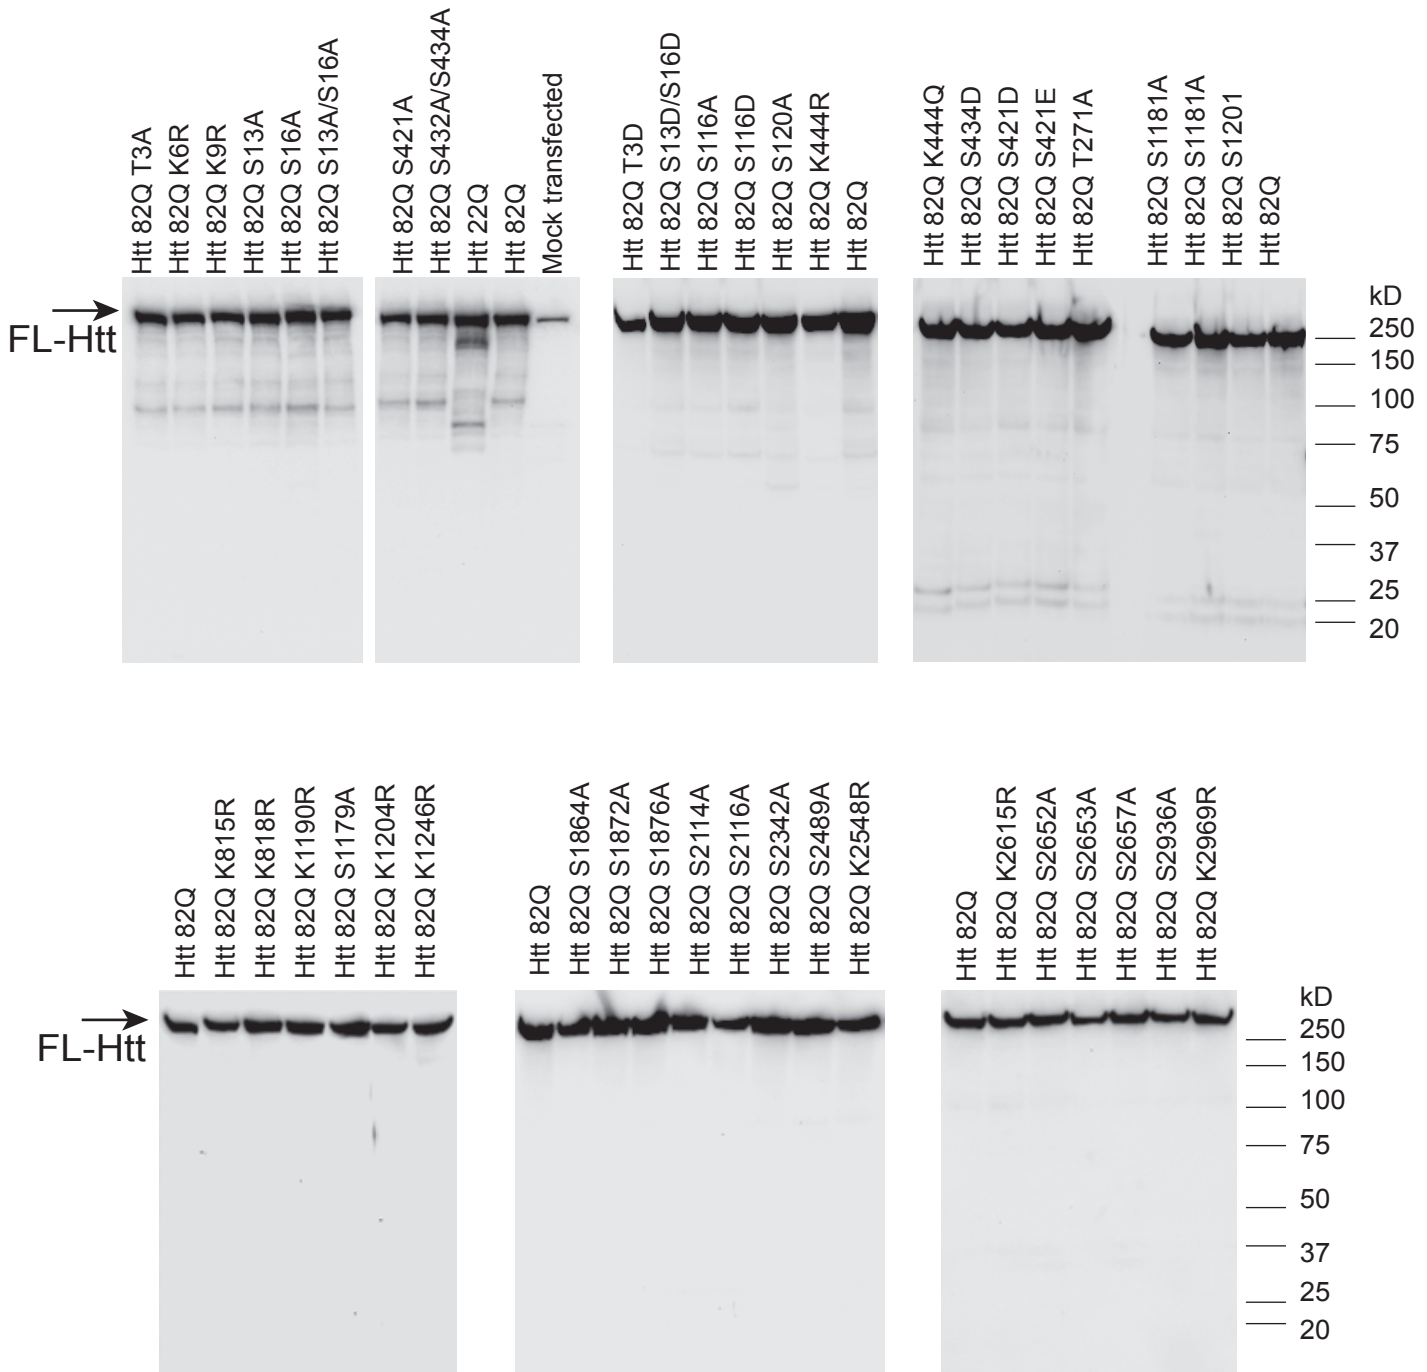

**Figure S1. Expression of full-length Htt proteins with PTM alterations.**

HEK 293 cells were transiently transfected with indicated constructs encoding full-length Htt-82Q with and without PTM alterations using Lipofectamine 2000 reagent (ThermoFisher Scientific) according to the manufacturer's protocol. 48 hours after transfection, total cell lysates were prepared using M-PER lysis buffer (ThermoFisher Scientific) according to the manufacturer's protocol. Protein concentrations were estimated using BCA method (Biorad). For Western blot analysis 20  $\mu$ g of total protein were fractionated on NuPAGE 4-12% Bis-Tris polyacrylamide gels, transferred to PVDF membranes, and probed with antibodies to Htt (MAB2166).
