# Supplementary material
Source: PubMed Central journal article supplement (PMC5702665)
Supplement: 10.1074_M117.782300_jbc.M117.782300-2.pdf [file 10.1074_M117.782300_jbc.M117.782300-2.pdf]

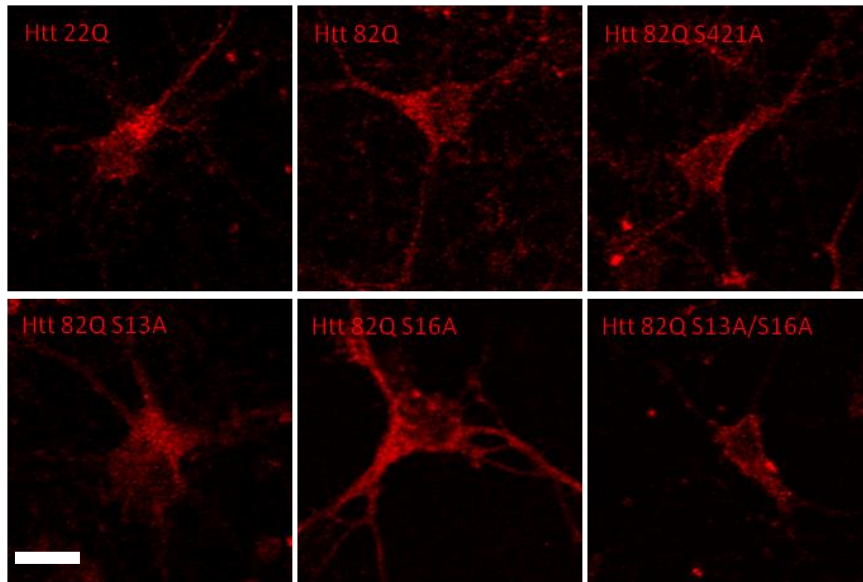

**Figure S2. Expression of full-length Htt proteins with PTM alterations in primary neurons.**

Primary cortical neurons were transiently transfected with indicated constructs encoding full-length Htt-82Q with and without PTM alterations using Lipofectamine 2000 reagent (ThermoFisher Scientific). 24 hours after transfection, cells were fixed with 4% Paraformaldehyde for 30 mn. Overexpressed Htt was visualized by immunofluorescence using mAb 2166 antibody.
